# Supplementary material for: Evaluating the Impact of Artificial Intelligence-Driven Triage Systems on Emergency Care Efficiency in Resource-Limited Settings: A Scoping Review
Source: Research Square preprint supplement (doi:10.21203/rs.3.rs-8097974/v1), 2025-11-28
Supplement: Supplementary file 1 [file a3c28030c86f942c4438f322.docx]

| Database | Search string | Total Hits | Included after screening |
| --- | --- | --- | --- |
| PubMed | ("artificial intelligence"[MeSH Terms] OR "machine learning" OR "deep learning" OR "natural language processing")  AND ("triage"[MeSH Terms] OR "emergency department triage" OR "emergency severity index" OR "acuity assessment")  AND ("emergency department" OR "emergency care" OR "emergency services")  AND ("low- and middle-income countries" OR "resource-limited" OR "developing countries")  Search strategies were adapted for each database. All searches were conducted between June 1 and September 15, 2025. | 412 | 19 |
| SCOPUS | (TITLE-ABS-KEY("artificial intelligence" OR "machine learning" OR "deep learning" OR "natural language processing" OR "AI" OR "neural network*" OR "predictive model*")  AND TITLE-ABS-KEY("triage" OR "emergency department" OR "emergency room" OR "ED triage" OR "emergency care" OR "acute care"))  AND TITLE-ABS-KEY("low-income countr*" OR "middle-income countr*" OR "resource-limited" OR "LMIC" OR "developing countr*" OR "global south" OR "sub-Saharan Africa" OR "Asia" OR "Latin America")  AND (LIMIT-TO(DOCTYPE, "ar") OR LIMIT-TO(DOCTYPE, "re"))  AND (PUBYEAR > 2015) | 305 | 9 |
| Web of Science | TS = (("artificial intelligence" OR "machine learning" OR "deep learning" OR "natural language processing" OR "AI" OR "neural network*" OR "decision support system*" OR "predictive algorithm*")  AND ("triage" OR "emergency department" OR "emergency room" OR "emergency care" OR "acute care")  AND ("low-income countr*" OR "middle-income countr*" OR "LMIC" OR "resource-limited" OR "developing countr*" OR "global south"))  Refined by: DOCUMENT TYPES: (ARTICLE OR REVIEW) AND LANGUAGES: (ENGLISH)  Timespan: 2015–2025  Indexes: SCI-EXPANDED, SSCI, ESCI | 238 | 6 |
| IEEE Xplore | ("artificial intelligence" OR "machine learning" OR "deep learning" OR "natural language processing" OR "AI" OR "neural network*" OR "predictive model*" OR "clinical decision support")  AND ("triage" OR "emergency department" OR "emergency care" OR "hospital triage" OR "ED triage system")  AND ("low-income" OR "middle-income" OR "resource-limited" OR "LMIC" OR "developing country" OR "health system")  Filters: Publication Year: 2015–2025; Document Type: Conference Paper, Journal Article; Language: English | 131 | 3 |
| Cochrane Library | ("artificial intelligence" OR "machine learning" OR "deep learning" OR "neural network" OR "AI" OR "clinical decision support")  AND ("triage" OR "emergency department" OR "emergency care" OR "ED triage")  AND ("low-income countr*" OR "middle-income countr*" OR "resource-limited" OR "LMIC" OR "developing countr*") | 87 | 2 |
| Embase | (('artificial intelligence'/exp OR 'machine learning'/exp OR 'deep learning'/exp OR 'natural language processing'/exp OR 'clinical decision support'/exp)  AND ('triage'/exp OR 'emergency department'/exp OR 'emergency care'/exp OR 'emergency room'/exp)  AND ('low income country'/exp OR 'middle income country'/exp OR 'resource limited' OR 'developing country'/exp OR LMIC OR 'global south'))  AND [english]/lim  AND [2015-2025]/py  AND ('article'/it OR 'review'/it) | 63 | 4 |
