# Supplementary material for: Evaluating the Impact of Artificial Intelligence-Driven Triage Systems on Emergency Care Efficiency in Resource-Limited Settings: A Scoping Review
Source: Research Square preprint supplement (doi:10.21203/rs.3.rs-8097974/v1), 2025-11-28
Supplement: Supplementary file 2 [file ab73c07fdbe847e3fc4d16da.xlsx]

## Sheet: Sheet1
Characteristics of Included Studies
Author (Year)	Country/Setting	Study Design	Population/Context	AI Model/Approach	Key Outcomes
Systematic Reviews & Scoping Reviews (n = 10)
Tyler et al. (2024)	USA	Scoping Review	ED patients	Mixed AI models	Synthesized applications, benefits, limitations of AI triage
Ahmed et al. (2025)	Multicenter (LMIC & HIC)	Systematic Review	ED triage studies	ML, NLP	Improved accuracy; decreased triage delays
El Arab & Al Moosa (2025)	Gulf Region	Integrative Systematic Review	EDs	AI-based tools	Enhanced prioritization; reduced wait times
Tahernejad et al. (2024)	Global LMIC	Systematic Review	Emergencies & disasters	ML, rule-based	Optimized triage in disaster settings
Yi et al. (2024)	South Korea	Systematic Review (prospective studies)	EDs	AI-assisted triage	Reduced ED crowding; patient safety improved
Porto (2024)	Global	Systematic Review	ED triage algorithms	ML + NLP	Improved classification accuracy
Ilick (2022)	Global	Systematic Review	Digital triage systems	ML, DL	Highlighted accuracy challenges & bias
Abdalhalim et al. (2025)	Sudan, Egypt	Systematic Review	EDs	ML-based triage	Clinical efficiency and safety
Božić (2023)	Europe	Narrative Review	ED triage	General AI	Benefits, risks, and ethical concerns
Friedman et al. (2024)	USA	Commentary/Review	ED practice	General AI	High promise, evidence gaps remain
Quantitative / Empirical Studies (n = 21)
Simbo.ai (2025a)	USA	Case study	ED patients	Proprietary AI	Reduced wait times
Simbo.ai (2025b)	USA	Case study	Crisis surge settings	Proprietary AI	Improved throughput during surges
Mednition (2025)	USA	Case series	ED admissions	NLP-based triage	Improved triage decision-making
Abadi et al. (2024)	Iran	Cross-sectional	ED patients	DL algorithm	Increased sensitivity in triage
Wang et al. (2023)	China	RCT	ED patients	ML model	Reduced misclassification
Choi et al. (2022)	South Korea	Cohort	ED patients	DL model	Improved sepsis detection
Gupta et al. (2023)	India	Prospective study	ED crowding	Hybrid ML	Reduced overcrowding
Lopez et al. (2022)	Spain	Pilot study	ED admissions	AI chatbot	Faster intake times
Möller et al. (2023)	Germany	Validation study	ED records	NLP + ML	Accurate urgency detection
Patel et al. (2024)	Kenya	Pilot study	ED (resource-limited)	Rule-based + ML	Feasible; positive staff feedback
Mwangi et al. (2023)	Kenya	Prospective study	ED patients	ML triage	Faster throughput in LMIC context
Silva et al. (2023)	Brazil	Pilot study	ED trauma patients	DL algorithm	Improved trauma triage accuracy
Nayeon Yi et al. (2024)	Korea	Prospective	ED prospective studies	AI classifiers	Reduced waiting & errors
Gonzalez et al. (2022)	Mexico	Cross-sectional	ED pediatric patients	ML	High sensitivity in pediatric triage
Zhang et al. (2023)	China	Validation	ED electronic records	DL	Better acuity prediction
Khan et al. (2024)	Pakistan	Cross-sectional	ED patients	Rule-based AI	Reduced waiting time
Osei et al. (2023)	Ghana	Pilot	ED resource-limited	ML triage	Feasible implementation
Rahman et al. (2023)	Bangladesh	Cross-sectional	ED patients	AI rule-based	Moderate accuracy; resource challenges
Adeyemi et al. (2024)	Nigeria	Prospective	ED urgent care	ML + NLP	Improved workflow
Park et al. (2023)	South Korea	Cohort	ED admissions	DL	Reduced adverse events
Smith et al. (2022)	USA	RCT	Urban ED	AI triage system	Shorter door-to-doctor times
Qualitative / Mixed-Methods Studies (n = 12)
Robinson et al. (2022)	UK	Interviews	ED clinicians	General AI	Barriers & ethical issues
Singh et al. (2024)	India	Focus groups	ED staff	Prototype AI triage	Improved decision confidence
Mwangi et al. (2023)	Kenya	Mixed-methods	ED staff/patients	ML triage	Staff skepticism, training gaps
Ali et al. (2023)	Egypt	Mixed-methods	ED clinicians	AI prototype	Reported faster decision-making
Torres et al. (2024)	Peru	Qualitative	ED patients	AI intake chatbot	Mixed patient satisfaction
Becker et al. (2023)	Germany	Mixed-methods	ED staff	AI triage tool	Improved workflow, but trust issues
Adepoju et al. (2023)	Nigeria	Interviews	ED nurses	ML-assisted triage	Limited digital literacy
Okeke et al. (2024)	Nigeria	Mixed-methods	ED doctors/nurses	AI prototype	Highlighted need for adaptation
Kumar et al. (2022)	India	Focus groups	ED physicians	AI triage app	Increased confidence, concerns on bias
Williams et al. (2022)	South Africa	Mixed-methods	ED rural hospitals	Rule-based AI	Feasible, but infrastructure weak
Rahman et al. (2022)	Bangladesh	Interviews	ED staff	AI triage	Concerns on workload & sustainability
Eze et al. (2024)	Nigeria	Mixed-methods	ED urban hospital	AI pilot tool	Enhanced prioritization
Industry / Non-peer-reviewed Reports (n = 5)
Simbo.ai (2025a)	USA	Case study	EDs	Proprietary AI	Wait time reduction
Simbo.ai (2025b)	USA	Case study	EDs (crisis)	Proprietary AI	Surge response improved
Mednition (2025)	USA	Industry report	EDs	NLP triage	Risk detection improved
Emergency Triage Blog (2025)	USA	Grey literature	EDs	Proprietary AI	Better outcomes
Simbo.ai (2024)	USA	Grey literature	ED implementations	Proprietary AI	Reduced crowding
